# Supplementary material for: Patient-controlled intravenous analgesia with opioids after thoracoscopic lung surgery: a randomized clinical trial
Source: PubMed Central journal article supplement (PMC9358799; doi:10.1186/s12871-022-01785-4), 2022-08-08
Supplement: 12871_2022_1785_MOESM2_ESM.pdf [file 12871_2022_1785_MOESM2_ESM.pdf]

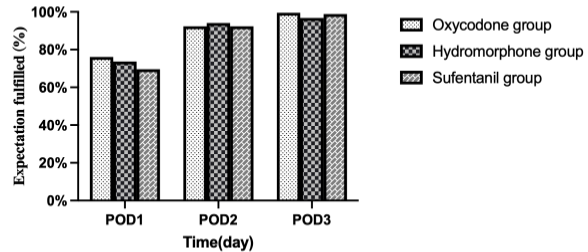

**A**

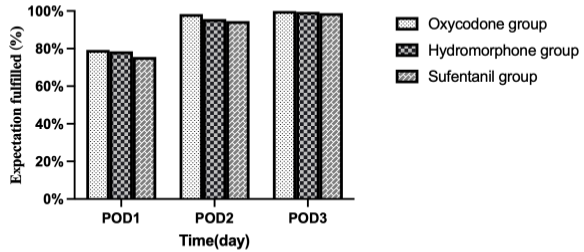

**B**

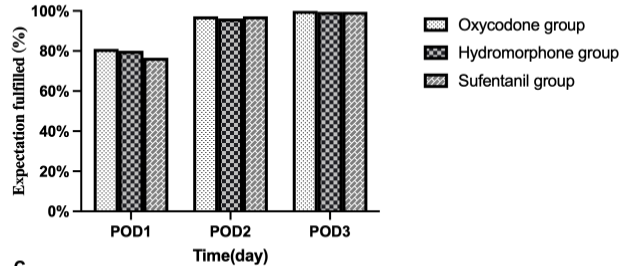

**C**

**Supplemental Figure S1** Expectation on pain fulfilled rate. POD, postoperative day.
